# Supplementary material for: Loneliness during the COVID-19 Pandemic in Patients with Burning Mouth Syndrome: A Multicentric Case-Control Italian Study
Source: Hindawi journal article supplement (doi:10.1155/2023/6666741), 2023-11-08
Supplement: f1 [file 6666741.f1.pdf]

## Additional File 1

### Section 1 – Socio-demographic form (SSD)

1. Current residence (region): \_\_\_\_\_
2. Current residence (city): \_\_\_\_\_
3. Current residence (province): \_\_\_\_\_
4. Gender:  Male  Female  Other
5. Age: \_\_\_\_\_
6. Weight (kg): \_\_\_\_\_
7. Height (cm): \_\_\_\_\_
8. City of birth: \_\_\_\_\_
9. Province of birth: \_\_\_\_\_
10. Country of birth: \_\_\_\_\_
11. Marital status:  
 Married/partner  Separated/divorced  Widower  Single
12. Educational level:  
 Primary School  Junior High School  High School  Professional School  University  
 Other: \_\_\_\_\_
13. Currently student:  Yes  No
14. Currently worker:  Yes  No
15. After the pandemic outbreak did you lose your job?  Yes  No
16. Job:  
 Househusband/housewife  Unemployed  Employed  Self-employed  
 Healthcare provider  Retired for age  Retired for illness  Other: \_\_\_\_\_
17. After the pandemic outbreak, how much are you gratified concerning your financial situation?  
 It could not be worse  Unsatisfied  Quite unsatisfied  Halfway  
 Quite satisfied  Satisfied  It could not be better
18. How many people do you live with? (Including you) \_\_\_\_\_
19. After the pandemic outbreak, how much are you satisfied by the people you live with? Or how much are you satisfied by living alone (if you live by yourself)?  
 It could not be worse  Unsatisfied  Quite unsatisfied  Halfway  
 Quite satisfied  Satisfied  It could not be better

20. After the pandemic outbreak, how much are you satisfied with the place where you live?  
 It could not be worse    Unsatisfied    Quite unsatisfied    Halfway  
 Quite satisfied    Satisfied    It could not be better

21. After the pandemic outbreak, do you spend more time on the Internet?  Yes    No

22. For which activities do you use the Internet?

|                                 | Never                    | Rarely                   | Sometimes                | Often                    | Always                   |
|---------------------------------|--------------------------|--------------------------|--------------------------|--------------------------|--------------------------|
| Instant messaging               | <input type="checkbox"/> | <input type="checkbox"/> | <input type="checkbox"/> | <input type="checkbox"/> | <input type="checkbox"/> |
| Social network                  | <input type="checkbox"/> | <input type="checkbox"/> | <input type="checkbox"/> | <input type="checkbox"/> | <input type="checkbox"/> |
| Search for information          | <input type="checkbox"/> | <input type="checkbox"/> | <input type="checkbox"/> | <input type="checkbox"/> | <input type="checkbox"/> |
| Entertainment                   | <input type="checkbox"/> | <input type="checkbox"/> | <input type="checkbox"/> | <input type="checkbox"/> | <input type="checkbox"/> |
| Shopping on-line                | <input type="checkbox"/> | <input type="checkbox"/> | <input type="checkbox"/> | <input type="checkbox"/> | <input type="checkbox"/> |
| Booking of travel/social events | <input type="checkbox"/> | <input type="checkbox"/> | <input type="checkbox"/> | <input type="checkbox"/> | <input type="checkbox"/> |
| Financial services              | <input type="checkbox"/> | <input type="checkbox"/> | <input type="checkbox"/> | <input type="checkbox"/> | <input type="checkbox"/> |
| Blog/debating on-line/forum     | <input type="checkbox"/> | <input type="checkbox"/> | <input type="checkbox"/> | <input type="checkbox"/> | <input type="checkbox"/> |
| Education/learning services     | <input type="checkbox"/> | <input type="checkbox"/> | <input type="checkbox"/> | <input type="checkbox"/> | <input type="checkbox"/> |

23. How much time do you usually spend on the Internet (hours)? \_\_\_\_\_

24. Do you suffer from any physical disorder?  Yes    No

25. Do you suffer from any psychiatric disorder?  Yes    No

## Section 2 – Burning Mouth Syndrome Questionnaire

1. How long have you been suffering from Burning Mouth Syndrome (months)?

\_\_\_\_\_

2. How many doctors have you been visited by before being diagnosed with Burning Mouth Syndrome?

\_\_\_\_\_

3. Which clinician(s) have you been visited by?

Dentist    Otolaryngologist    General doctor

Other (specify): \_\_\_\_\_

4. Has the Burning Mouth Syndrome always been steady since its first onset?  Yes    No

5. Did you already suffer from Burning Mouth Syndrome before the pandemic outbreak?  Yes    No

If yes, has the Burning Mouth Syndrome exacerbated after the pandemic outbreak?  Yes    No

If yes, how long has it been getting worse? \_\_\_\_\_

6. Has the Burning Mouth Syndrome currently reduced since its worsening or is it steady?

Reduced    Steady    I have not had any worsening

7. Which areas of the oral cavity are involved by the symptoms?

Tongue    Gums    Lips    Cheeks    Floor of mouth    Palate

Other (specify): \_\_\_\_\_

8. Please, read carefully each adjective below describing your pain. Place a “X” mark in the column that corresponds to your level of pain. Do this for each word.

|              | None (0)                 | Mild (1)                 | Moderate (2)             | Severe (3)               |
|--------------|--------------------------|--------------------------|--------------------------|--------------------------|
| 1. Throbbing | <input type="checkbox"/> | <input type="checkbox"/> | <input type="checkbox"/> | <input type="checkbox"/> |

|                       |                          |                          |                          |                          |
|-----------------------|--------------------------|--------------------------|--------------------------|--------------------------|
| 2. Shooting           | <input type="checkbox"/> | <input type="checkbox"/> | <input type="checkbox"/> | <input type="checkbox"/> |
| 3. Stabbing           | <input type="checkbox"/> | <input type="checkbox"/> | <input type="checkbox"/> | <input type="checkbox"/> |
| 4. Sharp              | <input type="checkbox"/> | <input type="checkbox"/> | <input type="checkbox"/> | <input type="checkbox"/> |
| 5. Cramping           | <input type="checkbox"/> | <input type="checkbox"/> | <input type="checkbox"/> | <input type="checkbox"/> |
| 6. Gnawing            | <input type="checkbox"/> | <input type="checkbox"/> | <input type="checkbox"/> | <input type="checkbox"/> |
| 7. Hot-burning        | <input type="checkbox"/> | <input type="checkbox"/> | <input type="checkbox"/> | <input type="checkbox"/> |
| 8. Aching             | <input type="checkbox"/> | <input type="checkbox"/> | <input type="checkbox"/> | <input type="checkbox"/> |
| 9. Heavy              | <input type="checkbox"/> | <input type="checkbox"/> | <input type="checkbox"/> | <input type="checkbox"/> |
| 10. Tender            | <input type="checkbox"/> | <input type="checkbox"/> | <input type="checkbox"/> | <input type="checkbox"/> |
| 11. Splitting         | <input type="checkbox"/> | <input type="checkbox"/> | <input type="checkbox"/> | <input type="checkbox"/> |
| 12. Tiring-Exhausting | <input type="checkbox"/> | <input type="checkbox"/> | <input type="checkbox"/> | <input type="checkbox"/> |
| 13. Sickening         | <input type="checkbox"/> | <input type="checkbox"/> | <input type="checkbox"/> | <input type="checkbox"/> |
| 14. Fearful           | <input type="checkbox"/> | <input type="checkbox"/> | <input type="checkbox"/> | <input type="checkbox"/> |
| 15. Cruel-Punishing   | <input type="checkbox"/> | <input type="checkbox"/> | <input type="checkbox"/> | <input type="checkbox"/> |

9. In addition to burning, do any of the following symptoms occur?

- Dysgeusia
- Xerostomia
- Sialorrhea
- Itching
- Intraoral Foreign Body Sensation
- Subjective Halitosis
- Tingling Sensation
- Change of Tongue Morphology
- Change of Tongue Colour
- Dysosmia
- Oral Dyskinesia
- Occlusal Dysesthesia
- None of the above
- Other (specify): \_\_\_\_\_

10. Are the symptoms steady throughout the day?

- Steady
- Milder in the morning and increased in the evening
- Fluctuating throughout the day
- Other: \_\_\_\_\_

11. Do the symptoms occur during the night?  Yes  No

12. Have you ever taken drugs to reduce Burning Mouth Syndrome symptoms?

- Pharmacological therapy
- OTC drugs/supplements
- Nothing

13. How intense is the burning sensation?

Consider "10" as the most intense pain you can imagine.

- 1
- 2
- 3
- 4
- 5
- 6
- 7
- 8
- 9
- 10

### Section 3 - Covid-19 Questions

1. Did you get the COVID-19 infection?  Yes  No

2. Have you been isolated after contracting the infection?  Yes  No

3. Have you been isolated after getting in contact with someone positive?  Yes  No

### Section 4 – GHQ-12

In the last year:

|                                                                     | <b>More than usual</b>   | <b>As usual</b>          | <b>Less than usual</b>   | <b>Much less than usual</b> |
|---------------------------------------------------------------------|--------------------------|--------------------------|--------------------------|-----------------------------|
| 1. Have you been able to concentrate well on what you were doing?   | <input type="checkbox"/> | <input type="checkbox"/> | <input type="checkbox"/> | <input type="checkbox"/>    |
| 2. Have you lost much sleep over worry?                             | <input type="checkbox"/> | <input type="checkbox"/> | <input type="checkbox"/> | <input type="checkbox"/>    |
| 3. Have you felt that you are playing a useful part in things?      | <input type="checkbox"/> | <input type="checkbox"/> | <input type="checkbox"/> | <input type="checkbox"/>    |
| 4. Have you felt capable of making decisions?                       | <input type="checkbox"/> | <input type="checkbox"/> | <input type="checkbox"/> | <input type="checkbox"/>    |
| 5. Have you felt constantly overwhelmed and stressed?               | <input type="checkbox"/> | <input type="checkbox"/> | <input type="checkbox"/> | <input type="checkbox"/>    |
| 6. Have you felt like you cannot overcome difficulties?             | <input type="checkbox"/> | <input type="checkbox"/> | <input type="checkbox"/> | <input type="checkbox"/>    |
| 7. Did you enjoy your day-to-day activities and get your free time? | <input type="checkbox"/> | <input type="checkbox"/> | <input type="checkbox"/> | <input type="checkbox"/>    |
| 8. Did you adequately cope with your problems?                      | <input type="checkbox"/> | <input type="checkbox"/> | <input type="checkbox"/> | <input type="checkbox"/>    |
| 9. Have you felt unhappy or depressed?                              | <input type="checkbox"/> | <input type="checkbox"/> | <input type="checkbox"/> | <input type="checkbox"/>    |
| 10. Have you lost confidence in yourself?                           | <input type="checkbox"/> | <input type="checkbox"/> | <input type="checkbox"/> | <input type="checkbox"/>    |
| 11. Have you thought that you are a person worthless?               | <input type="checkbox"/> | <input type="checkbox"/> | <input type="checkbox"/> | <input type="checkbox"/>    |
| 12. Do you feel reasonably happy considering all the circumstances? | <input type="checkbox"/> | <input type="checkbox"/> | <input type="checkbox"/> | <input type="checkbox"/>    |

### Section 5 – DASS-21

Please, read each sentence and mark how often the described situation has occurred in the last year. Consider that there are neither correct nor incorrect answers. Do not spend too much time on any statement, often the first answer is the most accurate. Thank you for your precious willingness and collaboration.

|                                                                                                                               | <b>Did not apply to me at all</b> | <b>Applied to me to some degree</b> | <b>Applied to me to a considerable degree</b> | <b>Applied to me most of the time</b> |
|-------------------------------------------------------------------------------------------------------------------------------|-----------------------------------|-------------------------------------|-----------------------------------------------|---------------------------------------|
| 1. I felt a lot of nervous tension and I found it hard to wind down                                                           | <input type="checkbox"/>          | <input type="checkbox"/>            | <input type="checkbox"/>                      | <input type="checkbox"/>              |
| 2. I was aware of dryness of my mouth                                                                                         | <input type="checkbox"/>          | <input type="checkbox"/>            | <input type="checkbox"/>                      | <input type="checkbox"/>              |
| 3. I could not seem to experience any positive feeling at all                                                                 | <input type="checkbox"/>          | <input type="checkbox"/>            | <input type="checkbox"/>                      | <input type="checkbox"/>              |
| 4. I experienced breathing difficulty (e.g., excessively rapid breathing, breathlessness in the absence of physical exertion) | <input type="checkbox"/>          | <input type="checkbox"/>            | <input type="checkbox"/>                      | <input type="checkbox"/>              |
| 5. I found it difficult to work up the initiative to do things                                                                | <input type="checkbox"/>          | <input type="checkbox"/>            | <input type="checkbox"/>                      | <input type="checkbox"/>              |
| 6. I tended to over-react to situations                                                                                       | <input type="checkbox"/>          | <input type="checkbox"/>            | <input type="checkbox"/>                      | <input type="checkbox"/>              |
| 7. I experienced trembling (e.g., in the hands)                                                                               | <input type="checkbox"/>          | <input type="checkbox"/>            | <input type="checkbox"/>                      | <input type="checkbox"/>              |
| 8. I felt that I was using a lot of nervous energy                                                                            | <input type="checkbox"/>          | <input type="checkbox"/>            | <input type="checkbox"/>                      | <input type="checkbox"/>              |
| 9. I was worried about situations in which I might panic and make fool of myself                                              | <input type="checkbox"/>          | <input type="checkbox"/>            | <input type="checkbox"/>                      | <input type="checkbox"/>              |
| 10. I felt that I had nothing to look forward to                                                                              | <input type="checkbox"/>          | <input type="checkbox"/>            | <input type="checkbox"/>                      | <input type="checkbox"/>              |
| 11. I felt stressed                                                                                                           | <input type="checkbox"/>          | <input type="checkbox"/>            | <input type="checkbox"/>                      | <input type="checkbox"/>              |
| 12. I found it difficult to relax                                                                                             | <input type="checkbox"/>          | <input type="checkbox"/>            | <input type="checkbox"/>                      | <input type="checkbox"/>              |
| 13. I felt down-hearted and blue                                                                                              | <input type="checkbox"/>          | <input type="checkbox"/>            | <input type="checkbox"/>                      | <input type="checkbox"/>              |
| 14. I felt intolerant of anything that kept me from getting on with what I was doing                                          | <input type="checkbox"/>          | <input type="checkbox"/>            | <input type="checkbox"/>                      | <input type="checkbox"/>              |
| 15. I felt I was close to panic                                                                                               | <input type="checkbox"/>          | <input type="checkbox"/>            | <input type="checkbox"/>                      | <input type="checkbox"/>              |

|                                                                                                                                          |                          |                          |                          |                          |
|------------------------------------------------------------------------------------------------------------------------------------------|--------------------------|--------------------------|--------------------------|--------------------------|
| 16. I was unable to become enthusiastic about anything                                                                                   | <input type="checkbox"/> | <input type="checkbox"/> | <input type="checkbox"/> | <input type="checkbox"/> |
| 17. I felt I wasn't worth much as a person                                                                                               | <input type="checkbox"/> | <input type="checkbox"/> | <input type="checkbox"/> | <input type="checkbox"/> |
| 18. I felt that I was rather touchy                                                                                                      | <input type="checkbox"/> | <input type="checkbox"/> | <input type="checkbox"/> | <input type="checkbox"/> |
| 19. I was aware of the action of my heart in the absence of physical exertion (e.g., sense of heart rate increase, heart missing a beat) | <input type="checkbox"/> | <input type="checkbox"/> | <input type="checkbox"/> | <input type="checkbox"/> |
| 20. I felt scared without any good reason                                                                                                | <input type="checkbox"/> | <input type="checkbox"/> | <input type="checkbox"/> | <input type="checkbox"/> |
| 21. I felt that life was meaningless                                                                                                     | <input type="checkbox"/> | <input type="checkbox"/> | <input type="checkbox"/> | <input type="checkbox"/> |

### Section 6 – OCI-R

The following statements refer to experiences that many people deal with in their everyday lives. Mark the box that best describes how much that experience has distressed or bothered you during the last year. Consider that there are no correct nor incorrect answers. Do not spend too much time on any statement, often the first answer is the most accurate. Thank you.

|                                                                                                       | Not at all               | A little                 | Moderately               | A lot                    | Extremely                |
|-------------------------------------------------------------------------------------------------------|--------------------------|--------------------------|--------------------------|--------------------------|--------------------------|
| 1. I have saved up so many things that they get in the way                                            | <input type="checkbox"/> | <input type="checkbox"/> | <input type="checkbox"/> | <input type="checkbox"/> | <input type="checkbox"/> |
| 2. I check things more often than necessary                                                           | <input type="checkbox"/> | <input type="checkbox"/> | <input type="checkbox"/> | <input type="checkbox"/> | <input type="checkbox"/> |
| 3. I get upset if objects are not arranged properly                                                   | <input type="checkbox"/> | <input type="checkbox"/> | <input type="checkbox"/> | <input type="checkbox"/> | <input type="checkbox"/> |
| 4. I feel compelled to count while I am doing things                                                  | <input type="checkbox"/> | <input type="checkbox"/> | <input type="checkbox"/> | <input type="checkbox"/> | <input type="checkbox"/> |
| 5. I find difficult to touch an object when I know it has been touched by strangers or certain people | <input type="checkbox"/> | <input type="checkbox"/> | <input type="checkbox"/> | <input type="checkbox"/> | <input type="checkbox"/> |
| 6. I find difficult to control my own thoughts                                                        | <input type="checkbox"/> | <input type="checkbox"/> | <input type="checkbox"/> | <input type="checkbox"/> | <input type="checkbox"/> |
| 7. I collect things I don't need                                                                      | <input type="checkbox"/> | <input type="checkbox"/> | <input type="checkbox"/> | <input type="checkbox"/> | <input type="checkbox"/> |
| 8. I repeatedly check doors, windows, drawers, etc.                                                   | <input type="checkbox"/> | <input type="checkbox"/> | <input type="checkbox"/> | <input type="checkbox"/> | <input type="checkbox"/> |
| 9. I get upset if others change the way I have arranged things                                        | <input type="checkbox"/> | <input type="checkbox"/> | <input type="checkbox"/> | <input type="checkbox"/> | <input type="checkbox"/> |
| 10. I feel I have to repeat certain numbers                                                           | <input type="checkbox"/> | <input type="checkbox"/> | <input type="checkbox"/> | <input type="checkbox"/> | <input type="checkbox"/> |
| 11. I sometimes have to wash or clean myself simply because I feel contaminated                       | <input type="checkbox"/> | <input type="checkbox"/> | <input type="checkbox"/> | <input type="checkbox"/> | <input type="checkbox"/> |
| 12. I am upset by unpleasant thoughts that come into my mind against my will                          | <input type="checkbox"/> | <input type="checkbox"/> | <input type="checkbox"/> | <input type="checkbox"/> | <input type="checkbox"/> |
| 13. I avoid throwing things away because I am afraid I might need them later                          | <input type="checkbox"/> | <input type="checkbox"/> | <input type="checkbox"/> | <input type="checkbox"/> | <input type="checkbox"/> |

|                                                                                     |                          |                          |                          |                          |                          |
|-------------------------------------------------------------------------------------|--------------------------|--------------------------|--------------------------|--------------------------|--------------------------|
| 14. I repeatedly check gas and water taps and light switches after turning them off | <input type="checkbox"/> | <input type="checkbox"/> | <input type="checkbox"/> | <input type="checkbox"/> | <input type="checkbox"/> |
| 15. I need things to be arranged in a particular way                                | <input type="checkbox"/> | <input type="checkbox"/> | <input type="checkbox"/> | <input type="checkbox"/> | <input type="checkbox"/> |
| 16. I feel that there are good and bad numbers                                      | <input type="checkbox"/> | <input type="checkbox"/> | <input type="checkbox"/> | <input type="checkbox"/> | <input type="checkbox"/> |
| 17. I wash my hands more often and longer than necessary                            | <input type="checkbox"/> | <input type="checkbox"/> | <input type="checkbox"/> | <input type="checkbox"/> | <input type="checkbox"/> |
| 18. I frequently get nasty thoughts and have difficulty in getting rid of them      | <input type="checkbox"/> | <input type="checkbox"/> | <input type="checkbox"/> | <input type="checkbox"/> | <input type="checkbox"/> |

**Section 7 – ISI**

1. Please, rate the current (i.e., last year) severity of your insomnia problems.

|                             | None                     | Mild                     | Moderate                 | Severe                   | Very severe              |
|-----------------------------|--------------------------|--------------------------|--------------------------|--------------------------|--------------------------|
| Difficulty falling asleep   | <input type="checkbox"/> | <input type="checkbox"/> | <input type="checkbox"/> | <input type="checkbox"/> | <input type="checkbox"/> |
| Difficulty staying asleep   | <input type="checkbox"/> | <input type="checkbox"/> | <input type="checkbox"/> | <input type="checkbox"/> | <input type="checkbox"/> |
| Problem waking up too early | <input type="checkbox"/> | <input type="checkbox"/> | <input type="checkbox"/> | <input type="checkbox"/> | <input type="checkbox"/> |

2. How satisfied/unsatisfied are you with your current sleep pattern?

Very satisfied    Satisfied    Neutral    Unsatisfied    Very unsatisfied

3.

|                                                                                                                                                                                                 | Not at all               | A little                 | Somewhat                 | Much                     | Very much                |
|-------------------------------------------------------------------------------------------------------------------------------------------------------------------------------------------------|--------------------------|--------------------------|--------------------------|--------------------------|--------------------------|
| To what extent do you consider your sleep problem to interfere with your daily functioning (e.g. daytime fatigue, ability to function at work/daily chores, concentration, memory, mood, etc.)? | <input type="checkbox"/> | <input type="checkbox"/> | <input type="checkbox"/> | <input type="checkbox"/> | <input type="checkbox"/> |
| How noticeable to others do you think your sleeping problem is in terms of impairing the quality of your life?                                                                                  | <input type="checkbox"/> | <input type="checkbox"/> | <input type="checkbox"/> | <input type="checkbox"/> | <input type="checkbox"/> |
| How worried/distressed are you about your current sleep problem?                                                                                                                                | <input type="checkbox"/> | <input type="checkbox"/> | <input type="checkbox"/> | <input type="checkbox"/> | <input type="checkbox"/> |

**Section 8 – NSESS**

Please, mark how often did you feel like described in the following sentences during the last year.

|                                                                                                                                                                                                                                                                                   | Not at all               | Rarely                   | Sometimes                | Often                    | Always                   |
|-----------------------------------------------------------------------------------------------------------------------------------------------------------------------------------------------------------------------------------------------------------------------------------|--------------------------|--------------------------|--------------------------|--------------------------|--------------------------|
| 1. Having “flashbacks”, that is, you suddenly acted or felt as if a stressful experience from the past was happening all over again (for example, you reexperienced parts of a stressful experience by seeing, hearing, smelling, or physically feeling parts of the experience)? | <input type="checkbox"/> | <input type="checkbox"/> | <input type="checkbox"/> | <input type="checkbox"/> | <input type="checkbox"/> |
| 2. Feeling very emotionally upset when something reminded you a stressful experience?                                                                                                                                                                                             | <input type="checkbox"/> | <input type="checkbox"/> | <input type="checkbox"/> | <input type="checkbox"/> | <input type="checkbox"/> |
| 3. Feeling detached from reality, your body or your memories?                                                                                                                                                                                                                     | <input type="checkbox"/> | <input type="checkbox"/> | <input type="checkbox"/> | <input type="checkbox"/> | <input type="checkbox"/> |

|                                                                                                                            |                          |                          |                          |                          |                          |
|----------------------------------------------------------------------------------------------------------------------------|--------------------------|--------------------------|--------------------------|--------------------------|--------------------------|
| 4. Trying to avoid thoughts, feelings, or physical sensations that reminded you of a stressful experience?                 | <input type="checkbox"/> | <input type="checkbox"/> | <input type="checkbox"/> | <input type="checkbox"/> | <input type="checkbox"/> |
| 5. Being “super alert”, on guard, or constantly on the lookout for danger?                                                 | <input type="checkbox"/> | <input type="checkbox"/> | <input type="checkbox"/> | <input type="checkbox"/> | <input type="checkbox"/> |
| 6. Feeling jumpy or easily startled when you hear an unexpected noise?                                                     | <input type="checkbox"/> | <input type="checkbox"/> | <input type="checkbox"/> | <input type="checkbox"/> | <input type="checkbox"/> |
| 7. Being extremely irritable or angry to the point where you yelled at other people, got into fights, or destroyed things? | <input type="checkbox"/> | <input type="checkbox"/> | <input type="checkbox"/> | <input type="checkbox"/> | <input type="checkbox"/> |

**Section 9 – SIDAS**

Please, answer to the following question choosing a number from 0 (never) to 9 (always).

1. In the last year, how often have you thought about suicide?  
 0     1     2     3     4     5     6     7     8     9

**Section 10 – IES-R**

Below there is a list of difficulties people sometimes must face after stressful life events. Please, read each item and then indicate how distressing each difficulty has been for you during the last year with respect to the event. How much were you distressed or bothered by these difficulties?

|                                                                                         | Not at all               | A little bit             | Moderately               | Quite a bit              | Extremely                |
|-----------------------------------------------------------------------------------------|--------------------------|--------------------------|--------------------------|--------------------------|--------------------------|
| 1. I thought about the stressful event when I didn't mean to                            | <input type="checkbox"/> | <input type="checkbox"/> | <input type="checkbox"/> | <input type="checkbox"/> | <input type="checkbox"/> |
| 2. I tried not to think about it                                                        | <input type="checkbox"/> | <input type="checkbox"/> | <input type="checkbox"/> | <input type="checkbox"/> | <input type="checkbox"/> |
| 3. I was aware that I still had a lot of feelings about it, but I didn't deal with them | <input type="checkbox"/> | <input type="checkbox"/> | <input type="checkbox"/> | <input type="checkbox"/> | <input type="checkbox"/> |
| 4. I had trouble concentrating                                                          | <input type="checkbox"/> | <input type="checkbox"/> | <input type="checkbox"/> | <input type="checkbox"/> | <input type="checkbox"/> |
| 5. I felt watchful and on-guard regarding environment and people                        | <input type="checkbox"/> | <input type="checkbox"/> | <input type="checkbox"/> | <input type="checkbox"/> | <input type="checkbox"/> |
| 6. Other things kept making me think about it                                           | <input type="checkbox"/> | <input type="checkbox"/> | <input type="checkbox"/> | <input type="checkbox"/> | <input type="checkbox"/> |

**Section 11 – ULS-8**

Please, read each item and then indicate how often you have felt like described in each sentence in the last year.

|                                            | Never                    | Rarely                   | Sometimes                | Always                   |
|--------------------------------------------|--------------------------|--------------------------|--------------------------|--------------------------|
| 1. I lack companionship                    | <input type="checkbox"/> | <input type="checkbox"/> | <input type="checkbox"/> | <input type="checkbox"/> |
| 2. There is no one I can turn to           | <input type="checkbox"/> | <input type="checkbox"/> | <input type="checkbox"/> | <input type="checkbox"/> |
| 3. I am an outgoing person                 | <input type="checkbox"/> | <input type="checkbox"/> | <input type="checkbox"/> | <input type="checkbox"/> |
| 4. I feel left out                         | <input type="checkbox"/> | <input type="checkbox"/> | <input type="checkbox"/> | <input type="checkbox"/> |
| 5. I feel in isolation from others         | <input type="checkbox"/> | <input type="checkbox"/> | <input type="checkbox"/> | <input type="checkbox"/> |
| 6. I can find companionship when I want it | <input type="checkbox"/> | <input type="checkbox"/> | <input type="checkbox"/> | <input type="checkbox"/> |
| 7. I am unhappy being so withdrawn         | <input type="checkbox"/> | <input type="checkbox"/> | <input type="checkbox"/> | <input type="checkbox"/> |

8. People are around me but not with me

|  |  |  |

**Section 12 - Brief Cope**

Please, try to answer each question like if it is detached from others. Choose the answer that is the most truthful for you. There are no correct nor incorrect answers, choose it without thinking about what “most people” would say or do. Read the statements and indicate what you do when you face a stressful event.

|                                                                                                                              | <b>I usually do not do this at all</b> | <b>I usually do this a little bit</b> | <b>I usually do this a medium amount</b> | <b>I usually do this a lot</b> |
|------------------------------------------------------------------------------------------------------------------------------|----------------------------------------|---------------------------------------|------------------------------------------|--------------------------------|
| 1. I turn to work or other activities to take my mind off things                                                             | <input type="checkbox"/>               | <input type="checkbox"/>              | <input type="checkbox"/>                 | <input type="checkbox"/>       |
| 2. I concentrate my efforts on doing something about the situation I'm in                                                    | <input type="checkbox"/>               | <input type="checkbox"/>              | <input type="checkbox"/>                 | <input type="checkbox"/>       |
| 3. I say to myself "this isn't real"                                                                                         | <input type="checkbox"/>               | <input type="checkbox"/>              | <input type="checkbox"/>                 | <input type="checkbox"/>       |
| 4. I use alcohol or other drugs to make myself feel better                                                                   | <input type="checkbox"/>               | <input type="checkbox"/>              | <input type="checkbox"/>                 | <input type="checkbox"/>       |
| 5. I get emotional support from others                                                                                       | <input type="checkbox"/>               | <input type="checkbox"/>              | <input type="checkbox"/>                 | <input type="checkbox"/>       |
| 6. I give up trying to deal with it                                                                                          | <input type="checkbox"/>               | <input type="checkbox"/>              | <input type="checkbox"/>                 | <input type="checkbox"/>       |
| 7. I take action to try to make the situation better                                                                         | <input type="checkbox"/>               | <input type="checkbox"/>              | <input type="checkbox"/>                 | <input type="checkbox"/>       |
| 8. I refuse to believe that it has happened                                                                                  | <input type="checkbox"/>               | <input type="checkbox"/>              | <input type="checkbox"/>                 | <input type="checkbox"/>       |
| 9. I say things to let my unpleasant feelings escape                                                                         | <input type="checkbox"/>               | <input type="checkbox"/>              | <input type="checkbox"/>                 | <input type="checkbox"/>       |
| 10. I get help and advice from other people                                                                                  | <input type="checkbox"/>               | <input type="checkbox"/>              | <input type="checkbox"/>                 | <input type="checkbox"/>       |
| 11. I use alcohol or other drugs to help me get through it                                                                   | <input type="checkbox"/>               | <input type="checkbox"/>              | <input type="checkbox"/>                 | <input type="checkbox"/>       |
| 12. I try to see it in a different light, to make it seem more positive                                                      | <input type="checkbox"/>               | <input type="checkbox"/>              | <input type="checkbox"/>                 | <input type="checkbox"/>       |
| 13. I have been criticizing myself                                                                                           | <input type="checkbox"/>               | <input type="checkbox"/>              | <input type="checkbox"/>                 | <input type="checkbox"/>       |
| 14. I try to come up with a strategy about what to do                                                                        | <input type="checkbox"/>               | <input type="checkbox"/>              | <input type="checkbox"/>                 | <input type="checkbox"/>       |
| 15. I get comfort and understanding from someone                                                                             | <input type="checkbox"/>               | <input type="checkbox"/>              | <input type="checkbox"/>                 | <input type="checkbox"/>       |
| 16. I give up the attempt to cope                                                                                            | <input type="checkbox"/>               | <input type="checkbox"/>              | <input type="checkbox"/>                 | <input type="checkbox"/>       |
| 17. I look for something good in what is happening                                                                           | <input type="checkbox"/>               | <input type="checkbox"/>              | <input type="checkbox"/>                 | <input type="checkbox"/>       |
| 18. I make jokes about it                                                                                                    | <input type="checkbox"/>               | <input type="checkbox"/>              | <input type="checkbox"/>                 | <input type="checkbox"/>       |
| 19. I do something to think about it less, such as going to movies, watching TV, reading, daydreaming, sleeping, or shopping | <input type="checkbox"/>               | <input type="checkbox"/>              | <input type="checkbox"/>                 | <input type="checkbox"/>       |
| 20. I accept the reality of the fact that it has happened                                                                    | <input type="checkbox"/>               | <input type="checkbox"/>              | <input type="checkbox"/>                 | <input type="checkbox"/>       |
| 21. I express my negative feelings                                                                                           | <input type="checkbox"/>               | <input type="checkbox"/>              | <input type="checkbox"/>                 | <input type="checkbox"/>       |
| 22. I try to find comfort in my religion or spiritual beliefs                                                                | <input type="checkbox"/>               | <input type="checkbox"/>              | <input type="checkbox"/>                 | <input type="checkbox"/>       |



|                                                                          |                          |                          |                          |                          |
|--------------------------------------------------------------------------|--------------------------|--------------------------|--------------------------|--------------------------|
| 23. I try to get advice or help from other people about what I should do | <input type="checkbox"/> | <input type="checkbox"/> | <input type="checkbox"/> | <input type="checkbox"/> |
| 24. I learn to live with it                                              | <input type="checkbox"/> | <input type="checkbox"/> | <input type="checkbox"/> | <input type="checkbox"/> |
| 25. I think hard about what steps to take                                | <input type="checkbox"/> | <input type="checkbox"/> | <input type="checkbox"/> | <input type="checkbox"/> |
| 26. I blame myself for things that happened                              | <input type="checkbox"/> | <input type="checkbox"/> | <input type="checkbox"/> | <input type="checkbox"/> |
| 27. I pray or meditate                                                   | <input type="checkbox"/> | <input type="checkbox"/> | <input type="checkbox"/> | <input type="checkbox"/> |
| 28. I make fun of the situation                                          | <input type="checkbox"/> | <input type="checkbox"/> | <input type="checkbox"/> | <input type="checkbox"/> |

**Section 13 –PTGI – SF**

Please, read each statement and indicate the life change level occurred after a traumatic event, in a scale from 0 (no change) to 5 (very important life change).

|                                                           | 0                        | 1                        | 2                        | 3                        | 4                        | 5                        |
|-----------------------------------------------------------|--------------------------|--------------------------|--------------------------|--------------------------|--------------------------|--------------------------|
| 1. Change of life values                                  | <input type="checkbox"/> | <input type="checkbox"/> | <input type="checkbox"/> | <input type="checkbox"/> | <input type="checkbox"/> | <input type="checkbox"/> |
| 2. Greater appreciation for the value of my own life      | <input type="checkbox"/> | <input type="checkbox"/> | <input type="checkbox"/> | <input type="checkbox"/> | <input type="checkbox"/> | <input type="checkbox"/> |
| 3. Deep spirituality                                      | <input type="checkbox"/> | <input type="checkbox"/> | <input type="checkbox"/> | <input type="checkbox"/> | <input type="checkbox"/> | <input type="checkbox"/> |
| 4. Establishing a new life path                           | <input type="checkbox"/> | <input type="checkbox"/> | <input type="checkbox"/> | <input type="checkbox"/> | <input type="checkbox"/> | <input type="checkbox"/> |
| 5. Greater sense of closeness with others                 | <input type="checkbox"/> | <input type="checkbox"/> | <input type="checkbox"/> | <input type="checkbox"/> | <input type="checkbox"/> | <input type="checkbox"/> |
| 6. I know better that I can handle difficulties           | <input type="checkbox"/> | <input type="checkbox"/> | <input type="checkbox"/> | <input type="checkbox"/> | <input type="checkbox"/> | <input type="checkbox"/> |
| 7. I appreciate more every new day                        | <input type="checkbox"/> | <input type="checkbox"/> | <input type="checkbox"/> | <input type="checkbox"/> | <input type="checkbox"/> | <input type="checkbox"/> |
| 8. I have a stronger religious faith                      | <input type="checkbox"/> | <input type="checkbox"/> | <input type="checkbox"/> | <input type="checkbox"/> | <input type="checkbox"/> | <input type="checkbox"/> |
| 9. I discovered that I'm stronger than I thought I was    | <input type="checkbox"/> | <input type="checkbox"/> | <input type="checkbox"/> | <input type="checkbox"/> | <input type="checkbox"/> | <input type="checkbox"/> |
| 10. I learned a great deal about how wonderful people are | <input type="checkbox"/> | <input type="checkbox"/> | <input type="checkbox"/> | <input type="checkbox"/> | <input type="checkbox"/> | <input type="checkbox"/> |

**Section 14 – Connor-Davidson Resilience Scale – short version**

Please, read each item and then indicate how you have been feeling in the last year in a scale that goes from 0 (rarely true) to 5 (about always true).

|                                                    | 0                        | 1                        | 2                        | 3                        | 4                        | 5                        |
|----------------------------------------------------|--------------------------|--------------------------|--------------------------|--------------------------|--------------------------|--------------------------|
| 1. I am able to adapt when changes occur           | <input type="checkbox"/> | <input type="checkbox"/> | <input type="checkbox"/> | <input type="checkbox"/> | <input type="checkbox"/> | <input type="checkbox"/> |
| 2. I can deal with whatever comes                  | <input type="checkbox"/> | <input type="checkbox"/> | <input type="checkbox"/> | <input type="checkbox"/> | <input type="checkbox"/> | <input type="checkbox"/> |
| 3. I try to see humorous side of problems          | <input type="checkbox"/> | <input type="checkbox"/> | <input type="checkbox"/> | <input type="checkbox"/> | <input type="checkbox"/> | <input type="checkbox"/> |
| 4. Coping with stress can strengthen me            | <input type="checkbox"/> | <input type="checkbox"/> | <input type="checkbox"/> | <input type="checkbox"/> | <input type="checkbox"/> | <input type="checkbox"/> |
| 5. I tend to bounce back after illness or hardship | <input type="checkbox"/> | <input type="checkbox"/> | <input type="checkbox"/> | <input type="checkbox"/> | <input type="checkbox"/> | <input type="checkbox"/> |
| 6. I can achieve goals despite obstacles           | <input type="checkbox"/> | <input type="checkbox"/> | <input type="checkbox"/> | <input type="checkbox"/> | <input type="checkbox"/> | <input type="checkbox"/> |
| 7. I can stay focused under pressure               | <input type="checkbox"/> | <input type="checkbox"/> | <input type="checkbox"/> | <input type="checkbox"/> | <input type="checkbox"/> | <input type="checkbox"/> |
| 8. I am not easily discouraged by failure          | <input type="checkbox"/> | <input type="checkbox"/> | <input type="checkbox"/> | <input type="checkbox"/> | <input type="checkbox"/> | <input type="checkbox"/> |
| 9. I think of myself as strong person              | <input type="checkbox"/> | <input type="checkbox"/> | <input type="checkbox"/> | <input type="checkbox"/> | <input type="checkbox"/> | <input type="checkbox"/> |
| 10. I can handle unpleasant feelings               | <input type="checkbox"/> | <input type="checkbox"/> | <input type="checkbox"/> | <input type="checkbox"/> | <input type="checkbox"/> | <input type="checkbox"/> |

**Section 15 – Use of medical services and surgical procedures form**

Since the pandemic outbreak:

- Have you been taking medicines?  Yes  No  
If yes, for which condition? \_\_\_\_\_
- If you have been taking medicines, have you increased their dosage since the pandemic outbreak?  
 Yes  No  I do not take medicines
- Have you ever accessed the emergency room?  Yes  No  
If yes, why? \_\_\_\_\_

4. Have you been hospitalized?  Yes  No  
If yes, why? \_\_\_\_\_
5. Have you been visited by your general practitioner?  Yes  No  
If yes, why? \_\_\_\_\_
6. Have you been visited by a medical guard?  Yes  No  
If yes, why? \_\_\_\_\_
7. Have you done a psychiatric consult?  Yes  No  
If yes, why? \_\_\_\_\_
8. Have you done other medical consults?  Yes  No  
If yes, which and why? \_\_\_\_\_
9. Have you done psychological interviews?  Yes  No  
If yes, how often? \_\_\_\_\_  
Why? \_\_\_\_\_

**Section 16 – Multidimensional Scale of Perceived Social Support**

Please, for each statement indicate a number from 1 (absolutely false) to 7 (absolutely true).

|                                                                        | 1                        | 2                        | 3                        | 4                        | 5                        | 6                        | 7                        |
|------------------------------------------------------------------------|--------------------------|--------------------------|--------------------------|--------------------------|--------------------------|--------------------------|--------------------------|
| 1. There is a special person who is around when I am in need           | <input type="checkbox"/> | <input type="checkbox"/> | <input type="checkbox"/> | <input type="checkbox"/> | <input type="checkbox"/> | <input type="checkbox"/> | <input type="checkbox"/> |
| 2. There is a special person with whom I can share my joys and sorrows | <input type="checkbox"/> | <input type="checkbox"/> | <input type="checkbox"/> | <input type="checkbox"/> | <input type="checkbox"/> | <input type="checkbox"/> | <input type="checkbox"/> |
| 3. My family really tries to help me                                   | <input type="checkbox"/> | <input type="checkbox"/> | <input type="checkbox"/> | <input type="checkbox"/> | <input type="checkbox"/> | <input type="checkbox"/> | <input type="checkbox"/> |
| 4. I get the emotional help and support I need from my family          | <input type="checkbox"/> | <input type="checkbox"/> | <input type="checkbox"/> | <input type="checkbox"/> | <input type="checkbox"/> | <input type="checkbox"/> | <input type="checkbox"/> |
| 5. I have a special person who is a real source of comfort to me       | <input type="checkbox"/> | <input type="checkbox"/> | <input type="checkbox"/> | <input type="checkbox"/> | <input type="checkbox"/> | <input type="checkbox"/> | <input type="checkbox"/> |
| 6. My friends really try to help me                                    | <input type="checkbox"/> | <input type="checkbox"/> | <input type="checkbox"/> | <input type="checkbox"/> | <input type="checkbox"/> | <input type="checkbox"/> | <input type="checkbox"/> |
| 7. I can count on my friends when things go wrong                      | <input type="checkbox"/> | <input type="checkbox"/> | <input type="checkbox"/> | <input type="checkbox"/> | <input type="checkbox"/> | <input type="checkbox"/> | <input type="checkbox"/> |
| 8. I can talk about my problems with my family                         | <input type="checkbox"/> | <input type="checkbox"/> | <input type="checkbox"/> | <input type="checkbox"/> | <input type="checkbox"/> | <input type="checkbox"/> | <input type="checkbox"/> |
| 9. I have friends with whom I can share my joys and sorrows            | <input type="checkbox"/> | <input type="checkbox"/> | <input type="checkbox"/> | <input type="checkbox"/> | <input type="checkbox"/> | <input type="checkbox"/> | <input type="checkbox"/> |
| 10. There is a special person in my life who cares about my feelings   | <input type="checkbox"/> | <input type="checkbox"/> | <input type="checkbox"/> | <input type="checkbox"/> | <input type="checkbox"/> | <input type="checkbox"/> | <input type="checkbox"/> |
| 11. My family is willing to help me make decisions                     | <input type="checkbox"/> | <input type="checkbox"/> | <input type="checkbox"/> | <input type="checkbox"/> | <input type="checkbox"/> | <input type="checkbox"/> | <input type="checkbox"/> |
| 12. I can talk about my problems with my friends                       | <input type="checkbox"/> | <input type="checkbox"/> | <input type="checkbox"/> | <input type="checkbox"/> | <input type="checkbox"/> | <input type="checkbox"/> | <input type="checkbox"/> |
